# Supplementary material for: Disrupted Cacna1c gene expression perturbs spontaneous Ca2+ activity causing abnormal brain development and increased anxiety
Source: PubMed Central journal article supplement — Proc Natl Acad Sci U S A. 2022 Feb 8;119(7):e2108768119. doi: 10.1073/pnas.2108768119 (PMC8851547; doi:10.1073/pnas.2108768119), 2022-02-08
Supplement: pnas.2108768119.sapp.pdf [file pnas.2108768119.sapp.pdf]

**Supplementary Information for**  
Disrupted *Cacna1c* Gene Expression Perturbs Spontaneous Ca<sup>2+</sup>  
Activity Causing Abnormal Brain Development and Increased Anxiety

Erik Smedler, Lauri Louhivuori, Roman A. Romanov, Débora Masini, Ivar Dehnisch Ellström, Chungliang Wang, Martino Caramia, Zoe West, Songbai Zhang, Paola Rebellato, Seth Malmersjö, Irene Brusini, Shigeaki Kanatani, Gilberto Fisone, Tibor Harkany, and Per Uhlén

Corresponding authors: Erik Smedler and Per Uhlén  
Email: [erik.smedler@gu.se](mailto:erik.smedler@gu.se) and [per.uhlen@ki.se](mailto:per.uhlen@ki.se)

**This PDF file includes:**

Supplementary text  
Figures S1 to S8  
Tables S1  
Legends for Movies S1 to S3  
SI References

**Other supplementary materials for this manuscript include the following:**

Movies S1 to S3

## Supplementary text

### Supplementary methods

The computational model is based on  $N$  individual and interconnected cells,

indexed  $i, j \in \{1:N\}, i \neq j$ .

- 1)  $C_m \frac{dV_m^i}{dt} = I_{app} - g_K W(V_m^i - V_K) - g_{Ca} m_\infty (V_m^i - V_{Ca}) - \sum_{i=1}^N C(i, j) g_{gap} (V_m^i - V_m^j)$
- 2)  $\frac{dw^i}{dt} = \varphi \frac{w_\infty - w^i}{\tau}$
- 3)  $\frac{d[Ca^{2+}]_{cyt}^i}{dt} = f_{cyt} \left[ -\frac{3}{2F} g_{Ca} m_\infty (V_m^i - V_{Ca}) - J_{PMCA} + (v_{RYR} P_{RYR} + v_{leakER}) ([Ca^{2+}]_{ER}^i - [Ca^{2+}]_{cyt}^i) - J_{SERCA} + \sum_{i=1}^N C(i, j) v_{gap} \left(\frac{r^j}{r^i}\right)^3 [Ca^{2+}]_{cyt}^j - [Ca^{2+}]_{cyt}^i \right]$
- 4)  $\frac{d[Ca^{2+}]_{tot}^i}{dt} = f_{cyt} \left[ -\frac{3}{2F} g_{Ca} m_\infty (V_m^i - V_{Ca}) - J_{PMCA} \right]$
- 5)  $[Ca^{2+}]_{ER}^i = \frac{[Ca^{2+}]_{tot}^i - [Ca^{2+}]_{cyt}^i}{\sigma}$

The connection between cells  $i$  and  $j$  is described by the matrix  $C$ .

$$C = \begin{pmatrix} C(1,1) & \cdots & C(1,N) \\ \vdots & \ddots & \vdots \\ C(N,1) & \cdots & C(N,N) \end{pmatrix}, \text{ where } C(i, j) = \begin{cases} 1 & \leftrightarrow i, j \text{ connected} \\ 0 & \leftrightarrow i, j \text{ disconnected} \end{cases}$$

The plasma membrane potential oscillator is described by the Morris-Lecar model (1).

$$m_\infty = 0.5 \left[ 1 + \tanh \left( \frac{V_m^i - V_1}{V_2} \right) \right]$$

$$w_\infty = 0.5 \left[ 1 + \tanh \left( \frac{V_m^i - V_3}{V_4} \right) \right]$$

$$\tau = \frac{1}{\cosh \left( \frac{V_m^i - V_3}{2V_4} \right)}$$

The plasma membrane  $\text{Ca}^{2+}$ -ATPase (PMCA) and sarco/endoplasmic reticulum  $\text{Ca}^{2+}$ -ATPase (SERCA) are described by Hill functions (1).

$$J_{PMCA/SERCA} = \frac{v_{max,PMCA/SERCA} [Ca^{2+}]_{cyt}^2}{K_{1/2,PMCA/SERCA}^2 + [Ca^{2+}]_{cyt}^2}$$

The ryanodine receptor (RyR) is described by Keizer and Levine (2) using a quasi-steady-state approximation (1).

$$P_{RyR} = n_{\infty} \frac{1 + \left(\frac{[Ca^{2+}]_{cyt}^i}{K_b}\right)^3}{1 + \left(\frac{K_a}{[Ca^{2+}]_{cyt}^i}\right)^4 + \left(\frac{[Ca^{2+}]_{cyt}^i}{K_b}\right)^3}$$

$$n_{\infty} = \frac{1 + \left(\frac{K_a}{[Ca^{2+}]_{cyt}^i}\right)^4 + \left(\frac{[Ca^{2+}]_{cyt}^i}{K_b}\right)^3}{1 + \frac{1}{K_c} + \left(\frac{K_a}{[Ca^{2+}]_{cyt}^i}\right)^4 + \left(\frac{[Ca^{2+}]_{cyt}^i}{K_b}\right)^3}$$

### Supplementary results

The computational model was based on three cells interconnected with gap junctions permeable to both electrical current and calcium ions ( $\text{Ca}^{2+}$ ) to varying degrees. Each individual cell was given its own time-dependent membrane potential ( $V_{PM}$ ), cytosolic  $\text{Ca}^{2+}$  concentration ( $[Ca^{2+}]_{cyt}$ ), and endoplasmic reticulum (ER)  $\text{Ca}^{2+}$  concentration ( $[Ca^{2+}]_{ER}$ ). The mobilization of  $\text{Ca}^{2+}$  within each cell was handled by typical  $\text{Ca}^{2+}$  transporters. The transport of  $\text{Ca}^{2+}$  into and out of the ER stores occurred through the SERCAs and RyRs, respectively. The passage of  $\text{Ca}^{2+}$  across the plasma membrane occurred through the PMCAs and voltage-gated  $\text{Ca}^{2+}$  channels (VGCCs). The membrane potential was dependent on the VGCCs and voltage-dependent potassium ( $\text{K}^+$ ) channels ( $I_K$ ). We did not include voltage-dependent sodium ( $\text{Na}^+$ ) channels in the model since experimental data from neural progenitor cells show that spontaneous  $\text{Ca}^{2+}$  activity is not blocked by  $\text{Na}^+$  channel inhibition (3). The VGCC was given the kinetics of an L-type  $\text{Ca}^{2+}$  channel with an activation voltage around the resting potential of -3 mV (*SI Appendix*, Fig. S1A). Electrophysiology

recordings show that the activation voltage of L-type VGCCs is -17.6 mV (4). We also included an experimentally applied current ( $I_{app}$ ) in our equations that could be used to validate the results from our computational model with the results from patch-clamp recordings. The model assumed spherical and well-stirred cells, fast  $Ca^{2+}$  buffers, and fast activation of VGCCs compared to  $K^+$  channels.

When we assigned the relevant experimental values to the parameters of our computational model (*SI Appendix*, Table S1), we observed spontaneous  $Ca^{2+}$  oscillations of 6 mHz (period  $T = 167$  s) with a FDHM of  $\sim 70$  s (Fig. 2B). These results were consistent with the experimental data from  $Ca^{2+}$  recordings in neural progenitor cells showing  $\sim 5$  mHz and 45 s (3). The experimental data also showed that the membrane potential oscillated considerably faster than the cytosolic  $Ca^{2+}$  concentration, at  $\sim 900$  mHz versus  $\sim 5$  mHz (3). The 180 times faster membrane potential oscillation is similar to the theoretical membrane potential oscillation, which oscillates 167 times faster (1000 mHz versus 6 mHz) than the cytosolic  $Ca^{2+}$  concentration. When the gap junction  $Ca^{2+}$  permeability was set to zero, unsynchronized signals were displayed, indicating that the  $Ca^{2+}$  level in a cell strongly affects the  $Ca^{2+}$  level in adjacent cells (*SI Appendix*, Fig. S1E). Calculation of the Pearson's correlation coefficient  $r$  between a pacemaker cell and an adjacent cell confirmed that increasing the  $Ca^{2+}$  permeability of the gap junctions synchronized the signals in adjacent cells (*SI Appendix*, Fig. S1F).

To assess the validity of our theoretical model, we inhibited ion transporters and compared the results with experimental data. The inhibition of RyRs blocked the  $Ca^{2+}$  oscillations both in the computational model and in experiments on neural progenitors (*SI Appendix*, Fig. S2A) but did not block membrane potential oscillations. The blockade of VGCCs abolished the spontaneous  $Ca^{2+}$  oscillations and membrane potential oscillations in both systems (*SI Appendix*, Fig. S2B). The inhibition of SERCA pumps only blocked the  $Ca^{2+}$  oscillations in the theoretical model and not in the experiments (*SI Appendix*, Fig. S2C). The membrane potential oscillations were not blocked by SERCA inhibition. Interestingly, previous experiments also showed that spontaneous  $Ca^{2+}$  activity

in neural progenitor cells persists upon SERCA inhibition with CPA or thapsigargin (3). A possible explanation for the discrepancy between the computational model and the experimental results may be incomplete pharmacological inhibition of SERCA. While testing this hypothesis, we observed that partial inhibition of SERCA reduced the amplitude of the spontaneous  $\text{Ca}^{2+}$  oscillations (*SI Appendix*, Fig. S2D). Notably, SERCA inhibition also decreased the amplitude of spontaneous  $\text{Ca}^{2+}$  oscillations in the experiments (*SI Appendix*, Fig. S2C), suggesting that 1  $\mu\text{M}$  thapsigargin could not completely inhibit the SERCA pump. Our theoretical model showed that 65% SERCA inhibition was sufficient to entirely abolish the spontaneous  $\text{Ca}^{2+}$  oscillations (*SI Appendix*, Fig. S2E). Together, this set of experiments demonstrated the accuracy of our theoretical model and that spontaneous  $\text{Ca}^{2+}$  activity requires spontaneous membrane potential oscillations and not *vice versa*.

To determine the oscillatory regime, we performed a bifurcation analysis (5). Bifurcation analysis is a powerful tool to study the dynamics of nonlinear systems (6). We chose to study Hopf bifurcation points as they describe a critical point where a system's stability switches and a periodic solution arises (5). By varying either the gap junction conductance or the VGCC conductance while keeping the other constant, oscillatory regimes emerged that were delimited by Hopf bifurcation points (*SI Appendix*, Fig. S3 A–D). These Hopf bifurcations were classified as supercritical since the amplitudes of the function gradually increased (7). Treating the RyR permeability to  $\text{Ca}^{2+}$  as a bifurcation parameter once again showed that the spontaneous  $\text{Ca}^{2+}$  oscillations were driven by membrane potential oscillations and not *vice versa* (*SI Appendix*, Fig. S3E). While varying the RyR permeability to  $\text{Ca}^{2+}$  in the pacemaker cells, the  $\text{Ca}^{2+}$  activity was measured in either the pacemaker (blue trace) or nonpacemaker cell (red trace). The nonpacemaker cell was unaffected by increases or decreases in the RyR permeability to  $\text{Ca}^{2+}$  in the adjacent pacemaker cell, implying that the electrical current was still conducted via gap junctions. However, the pacemaker cell stopped oscillating when the permeability values became too high ( $\nu_{\text{RyR}} \approx 10^2 \text{ s}^{-1}$ ) but continued to oscillate under low permeability values ( $\nu_{\text{RyR}} \approx 10^{-4} \text{ s}^{-1}$ ). Under these circumstances, the spontaneous  $\text{Ca}^{2+}$

oscillations in the pacemaker cell were driven by the adjacent nonpacemaker cells, which was proven by the finding that the activity vanished upon gap junction inhibition (*SI Appendix*, Fig. S3F).

To calculate the percentage of pacemaker cells generated by the computational model, we determined an expression distribution for *Cacna1c*. Since the variances of the RT-qPCR values exceeded the means and could thus not be classified as Poisson (8), we assumed a Gaussian distribution of expression. Using the mean and standard deviation values from the *Cacna1c* RT-qPCR experiments (*SI Appendix*, Fig. S4G), we derived a Gauss curve for each day of neural progenitor differentiation (Fig. 3D). By combining the *Cacna1c* RT-qPCR measurements for each day with the bifurcation window ( $\Delta = 39\%$ ) that enabled spontaneous  $\text{Ca}^{2+}$  oscillations (*SI Appendix*, Fig. S3D), we performed a statistical assumption for the percentage of pacemaker cells from the Gauss distributions (Fig. 3 D and E). On day 8, when a significant increase in the number of spontaneously active neural progenitor cells was observed, the computational model predicted 20% pacemaker cells (*SI Appendix*, Fig. S4C).

Our data generated by the computational model suggested that the only difference between a pacemaker cell and a nonpacemaker cell was the VGCC conductance. To assess the validity of this conclusion, we performed a series of patch-clamp recordings. We first tested whether individual cells in our neural progenitor cell population were excitable or non-excitable (*SI Appendix*, Fig. S5 C–E). When a current pulse was applied, excitable cells responded with a transient response, whereas non-excitable cells responded with oscillations (*SI Appendix*, Fig. S5 F–H).

## Supplementary Figures

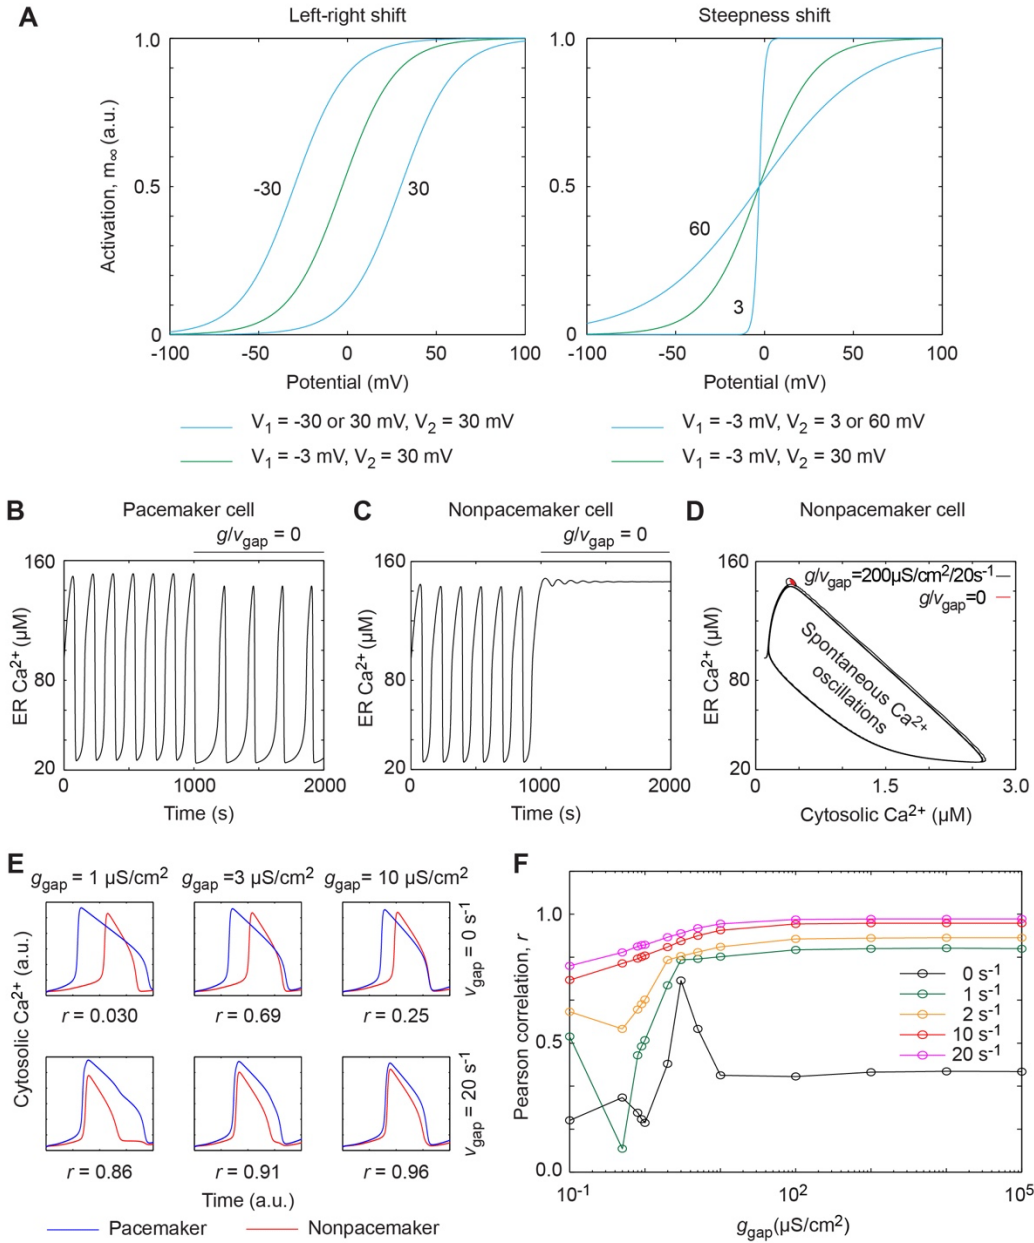

**Fig. S1. Modelling the influence of VGCCs and gap junctions on pacemaker and nonpacemaker cells.** (A) The kinetics of VGCCs in our model. The activation variable as a function of the voltage parameters  $V_1$  (activation voltage) and  $V_2$  (voltage width). (B and C) The concentration of  $\text{Ca}^{2+}$  in the endoplasmic reticulum (ER) in a pacemaker cell (B) and nonpacemaker cell (C) upon inhibition of gap junctions. (D) Phase plot of the  $\text{Ca}^{2+}$  concentration in the cytosol and ER in a nonpacemaker cell before (black) and after (red) inhibition of gap junctions. (E) Cytosolic  $\text{Ca}^{2+}$  in a pacemaker cell (blue) and nonpacemaker cell (red) at various gap junction  $\text{Ca}^{2+}$  permeabilities and conductance, as indicated. The Pearson's  $r$  is stated for each condition. (F) The Pearson correlation ( $r$ ) as a function of gap junction  $\text{Ca}^{2+}$  permeability ( $g_{\text{gap}}$ ) between a pacemaker and nonpacemaker cell.

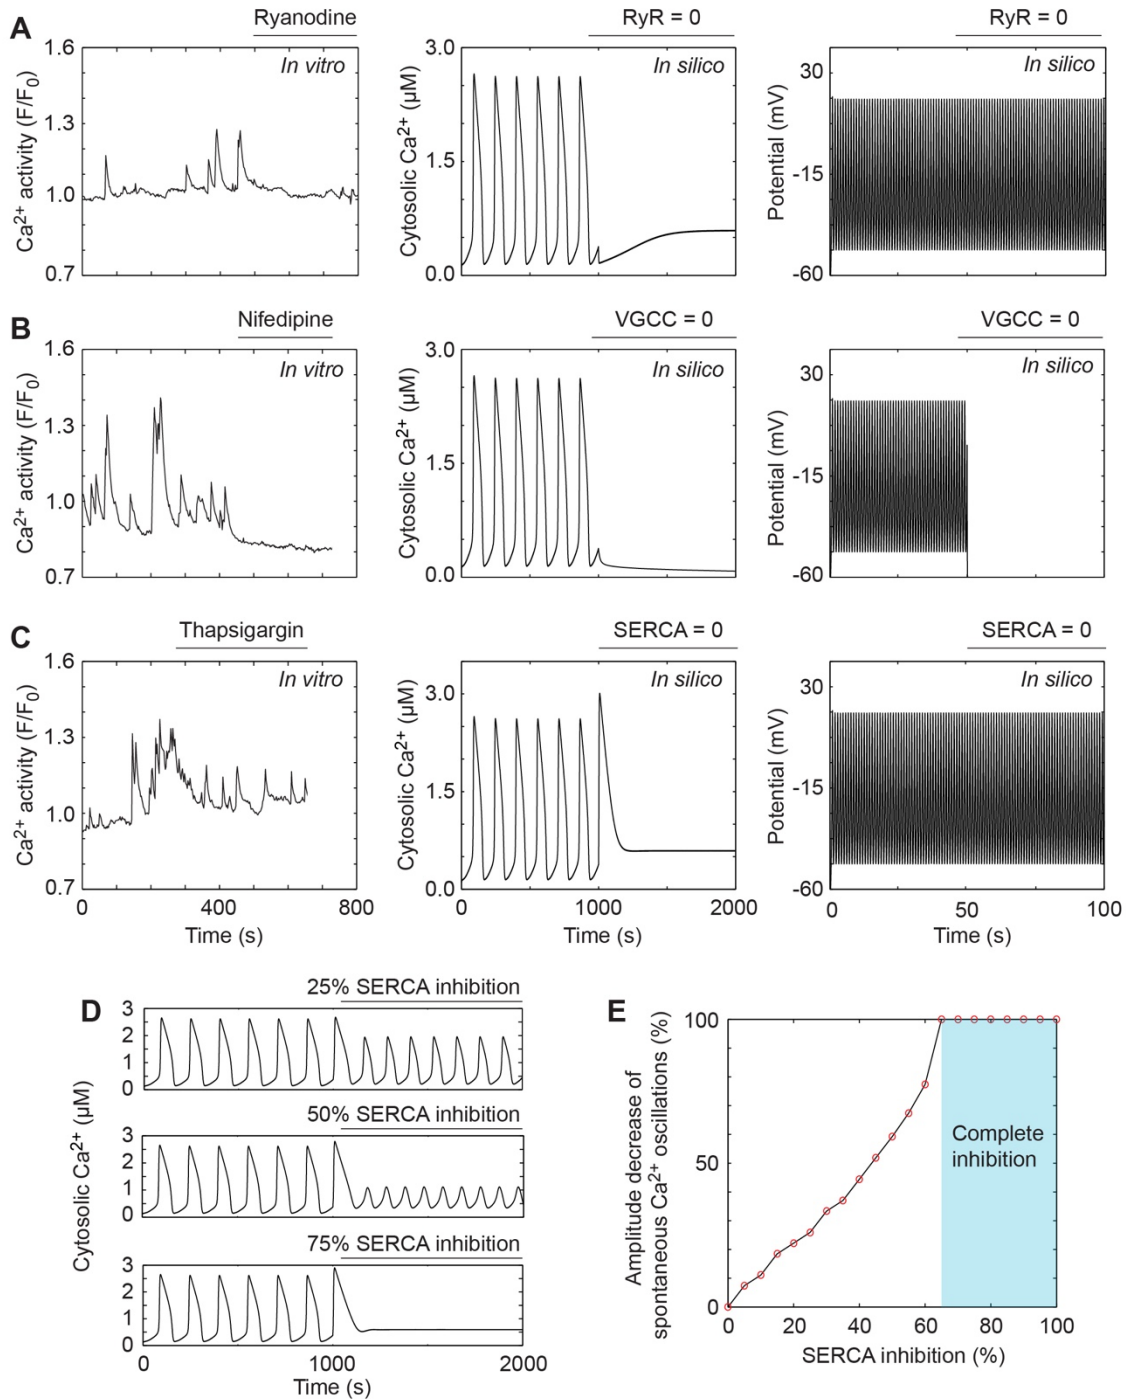

**Fig. S2. Modelling the influence of RyR, VGCC, and SERCA inhibition on spontaneous  $Ca^{2+}$  oscillations.** (A to C) The effect on spontaneous  $Ca^{2+}$  oscillations upon inhibition of RyR with 10  $\mu M$  ryanodine (A), VGCC with 5  $\mu M$  nifedipine (B), and SERCA with 1  $\mu M$  thapsigargin (C). Experimental data from neural progenitor cells are indicated *in vitro* and computational data are indicated *in silico*. (D) The effect on spontaneous  $Ca^{2+}$  oscillations upon 25%, 50%, and 75% inhibition of SERCA. (E) The decrease in amplitude of spontaneous  $Ca^{2+}$  oscillations as a function of SERCA inhibition. The blue shaded area indicates complete inhibition of oscillations.



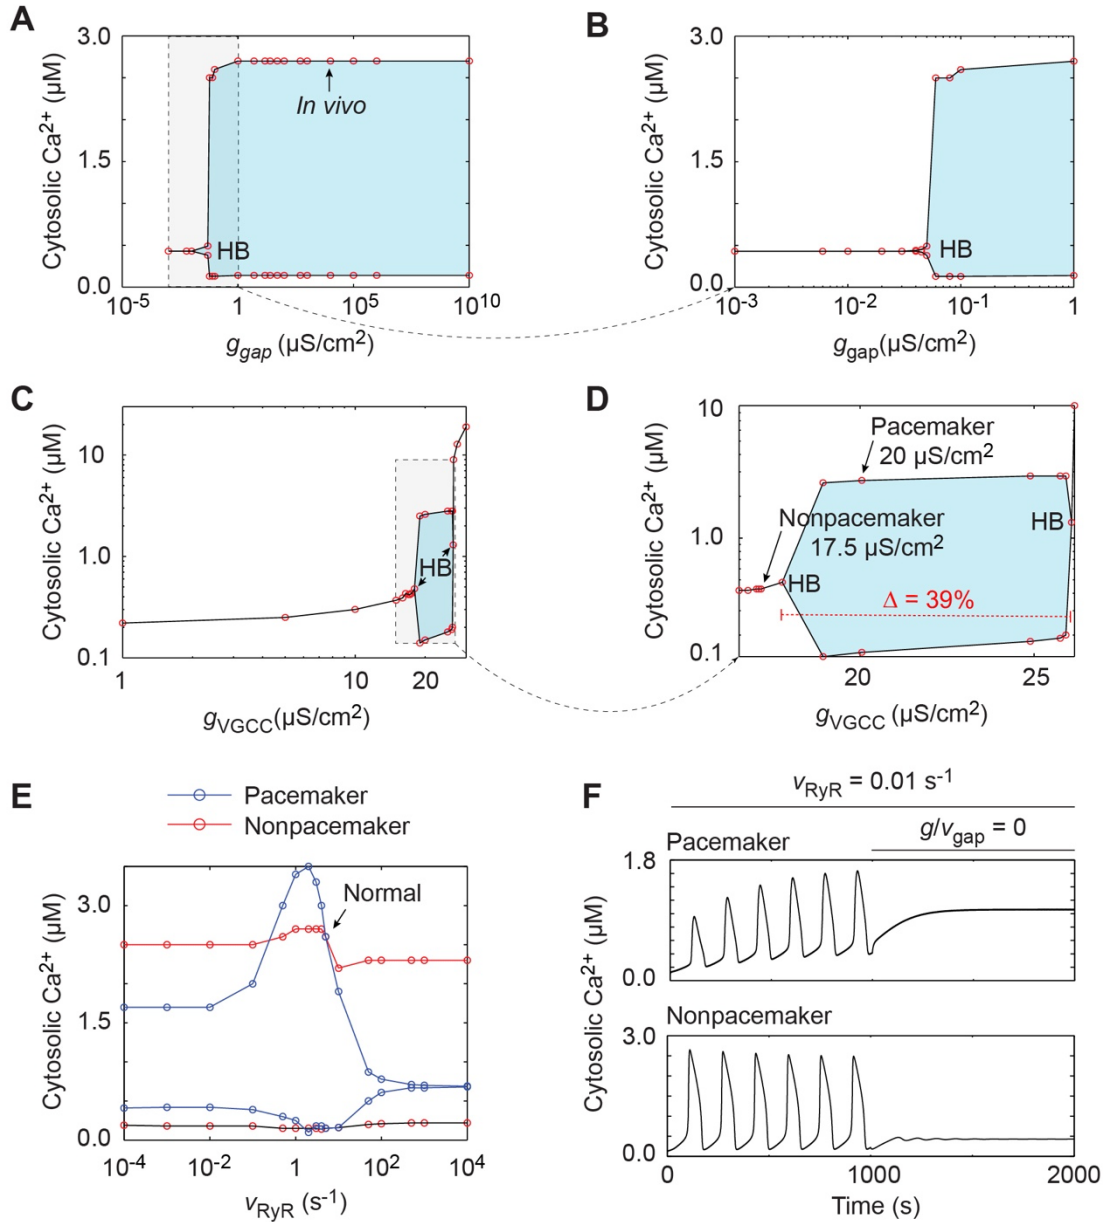

**Fig. S3. Bifurcation analyses of gap junction, VGCC, and RyR conductances.** (A) Bifurcation analysis of the cytosolic  $\text{Ca}^{2+}$  concentration in a nonpacemaker cell with the gap junction conductance ( $g_{\text{gap}}$ ) as bifurcation parameter when  $v_{\text{gap}} = 0 \text{ s}^{-1}$  and  $g_{\text{VGCC}} = 17.5 \mu\text{S}/\text{cm}^2$ . Hopf bifurcation (HB) at  $g_{\text{gap}} = 0.04 \mu\text{S}/\text{cm}^2$ . *In vivo*, the gap junction conductance in neural progenitors. (B) Magnified view of the indicated region in (A). (C) Bifurcation analysis of the cytosolic  $\text{Ca}^{2+}$  concentration in a nonpacemaker cell with the VGCC conductance ( $g_{\text{VGCC}}$ ) as bifurcation parameter when  $g_{\text{gap}} = 200 \mu\text{S}/\text{cm}^2$  and  $v_{\text{gap}} = 20 \text{ s}^{-1}$ . Hopf bifurcations (HB) at  $g_{\text{VGCC}} = 18 \mu\text{S}/\text{cm}^2$  and  $25 \mu\text{S}/\text{cm}^2$ . (D) Magnified view of the indicated region in (C). (E) Bifurcation analysis of the cytosolic  $\text{Ca}^{2+}$  concentration in a pacemaker cell (blue) and a nonpacemaker cell (red) with the RyR  $\text{Ca}^{2+}$  permeability ( $v_{\text{RyR}}$ ) as bifurcation parameter. (F) The effect on spontaneous  $\text{Ca}^{2+}$  oscillations upon  $\text{Ca}^{2+}$  influx inhibition in a pacemaker cell (top) and a nonpacemaker cell (bottom).

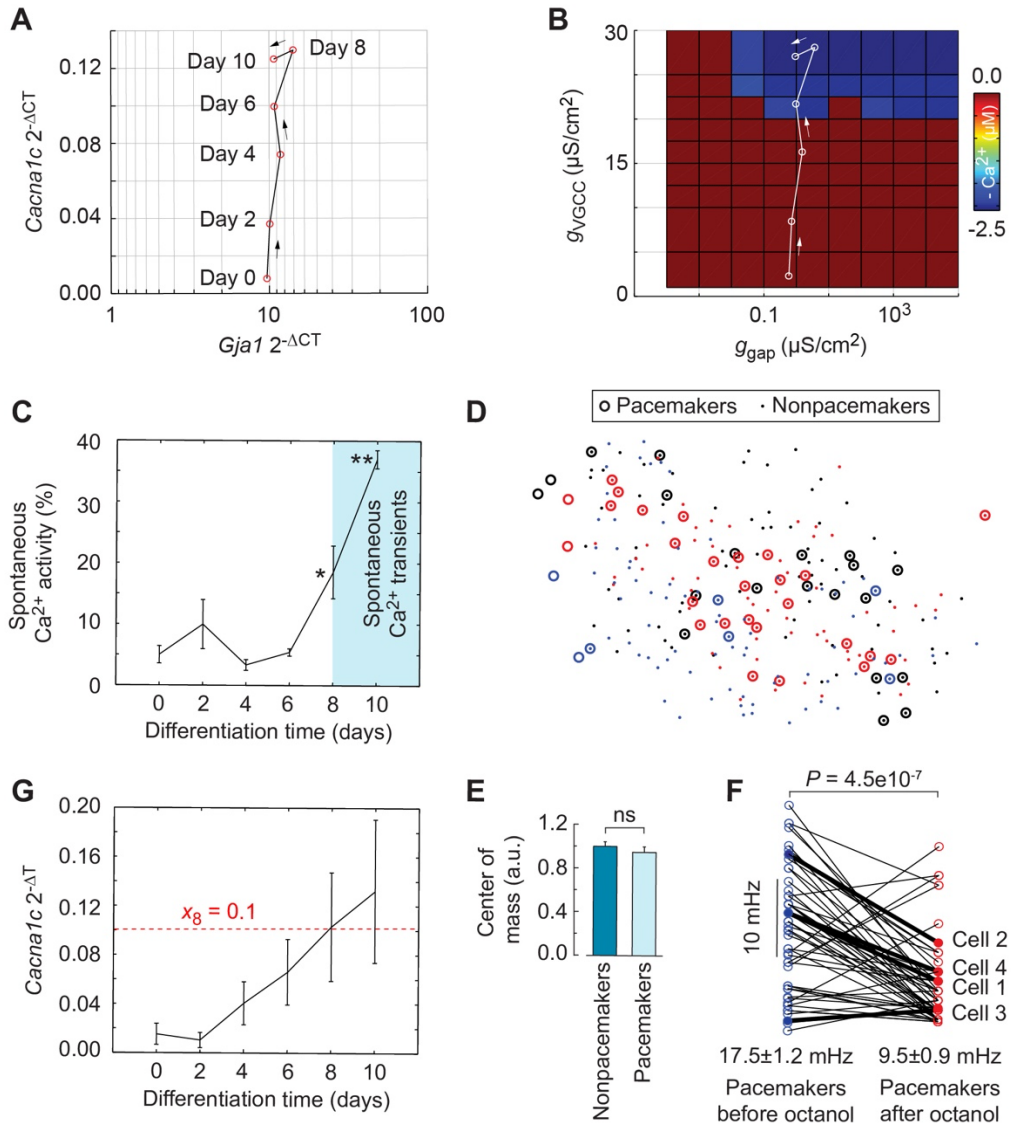

**Fig. S4. Influence of *Cacna1c* expression on spontaneous  $Ca^{2+}$  activity in pacemaker and nonpacemaker cells.** (A) Trajectory of differentiating embryonic stem (ES) cells based on the RT-qPCR measurements of *Cacna1c* and *Gja1*. The values are the mean expression of the connexin-43 gap junction gene *Gja1* (x-axis) and the  $Ca_v1.2$  subunit gene *Cacna1c* (y-axis) at days 0 to 10 of differentiation. (B) Bifurcation analysis with the gap junction and VGCC conductances,  $g_{gap}$  and  $g_{VGCC}$ , respectively, as bifurcation parameters. The values are  $g_{gap}$  (x-axis) and  $g_{VGCC}$  (y-axis). The trajectory of the experimental measurements in (A) is superimposed onto the bifurcation surface plot. (C) The percentage of differentiating cells with spontaneous  $Ca^{2+}$  activity at days 0 to 10. The blue shaded area indicates significant spontaneous  $Ca^{2+}$  oscillations. (D) The spatial distribution of pacemaker cells (ring) and nonpacemaker cells (dots) in experiments on neural progenitor cells ( $N = 3$ ). (E) The center of mass of the pacemaker ( $N = 3$ ) and nonpacemaker ( $N = 3$ ) cell populations in (D). (F) Frequency analysis of the spontaneous  $Ca^{2+}$  oscillations in pacemaker cells before and after gap junction inhibition with 1 mM octanol. (G) The expression of *Cacna1c* in differentiating ES cells for ten days. The expression level on day 8 is indicated  $x_8$ . The values are the mean  $\pm$  s.e.m. The significance tests were calculated using unpaired (C, E) and paired (F) two-sided *t*-tests. \* $P < 0.05$ , \*\* $P < 0.01$ ; ns, non-significant ( $P > 0.05$ ).

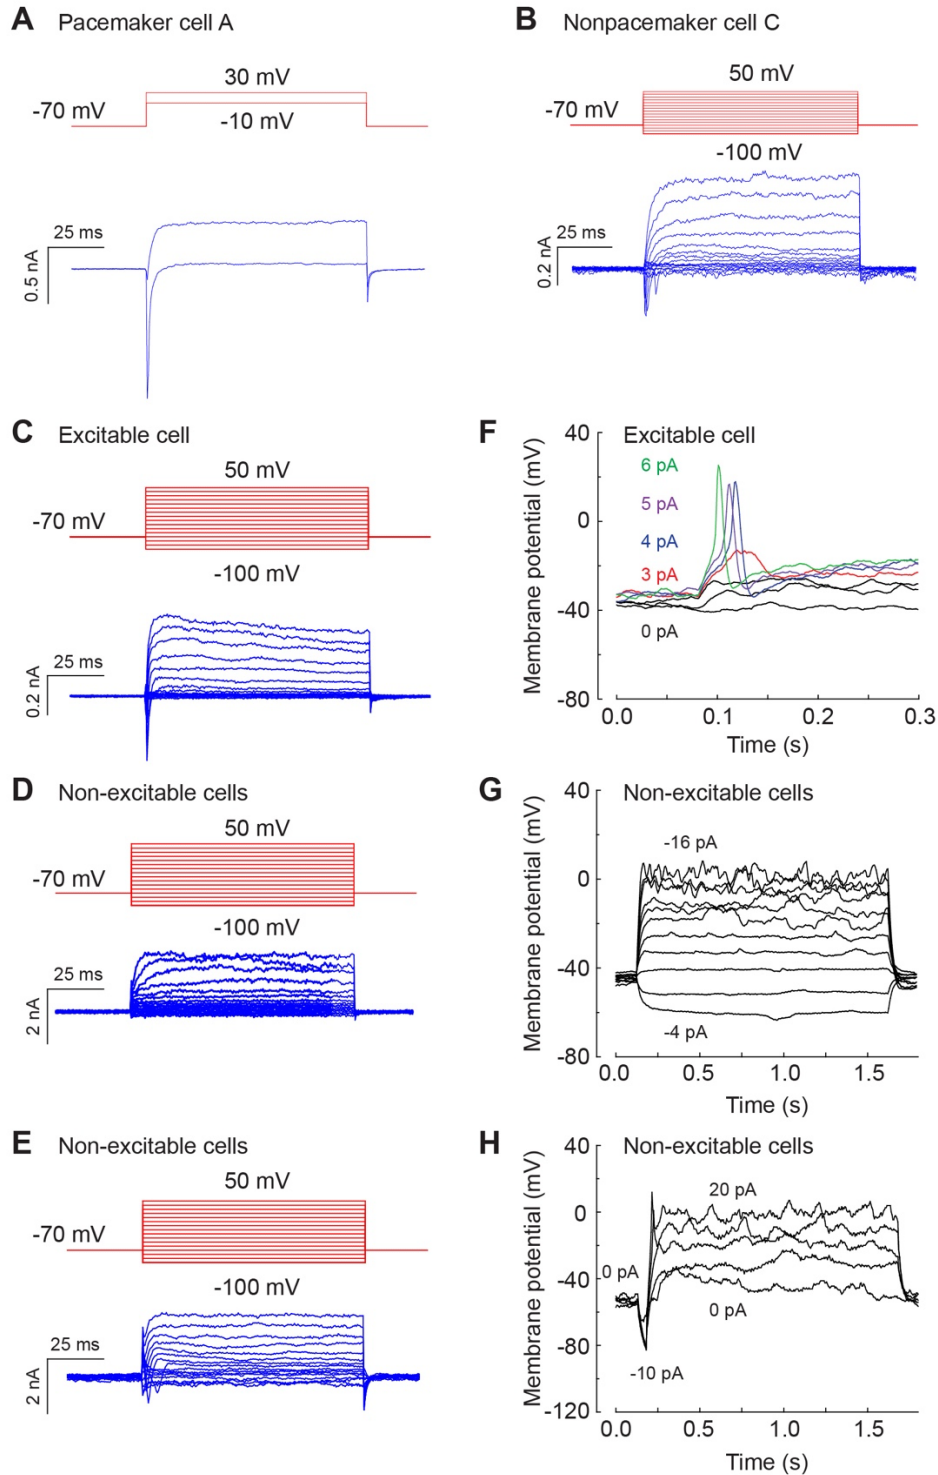

**Fig. S5. Membrane potential responses in excitable and non-excitable cells.** (A to E) Ion current recordings (voltage-clamp mode) upon application of rectangular voltage pulses in the pacemaker cell A of Fig. 4B (A) and nonpacemaker cell C of Fig. 4E (B), and in an excitable cell (C) and non-excitable cells (D and E). Red traces, applied rectangular voltage pulses. Blue traces, recorded currents. (F to H) Membrane potential recordings (current clamp mode) upon application of various currents in an excitable cell (F) and non-excitable cells (G and H).

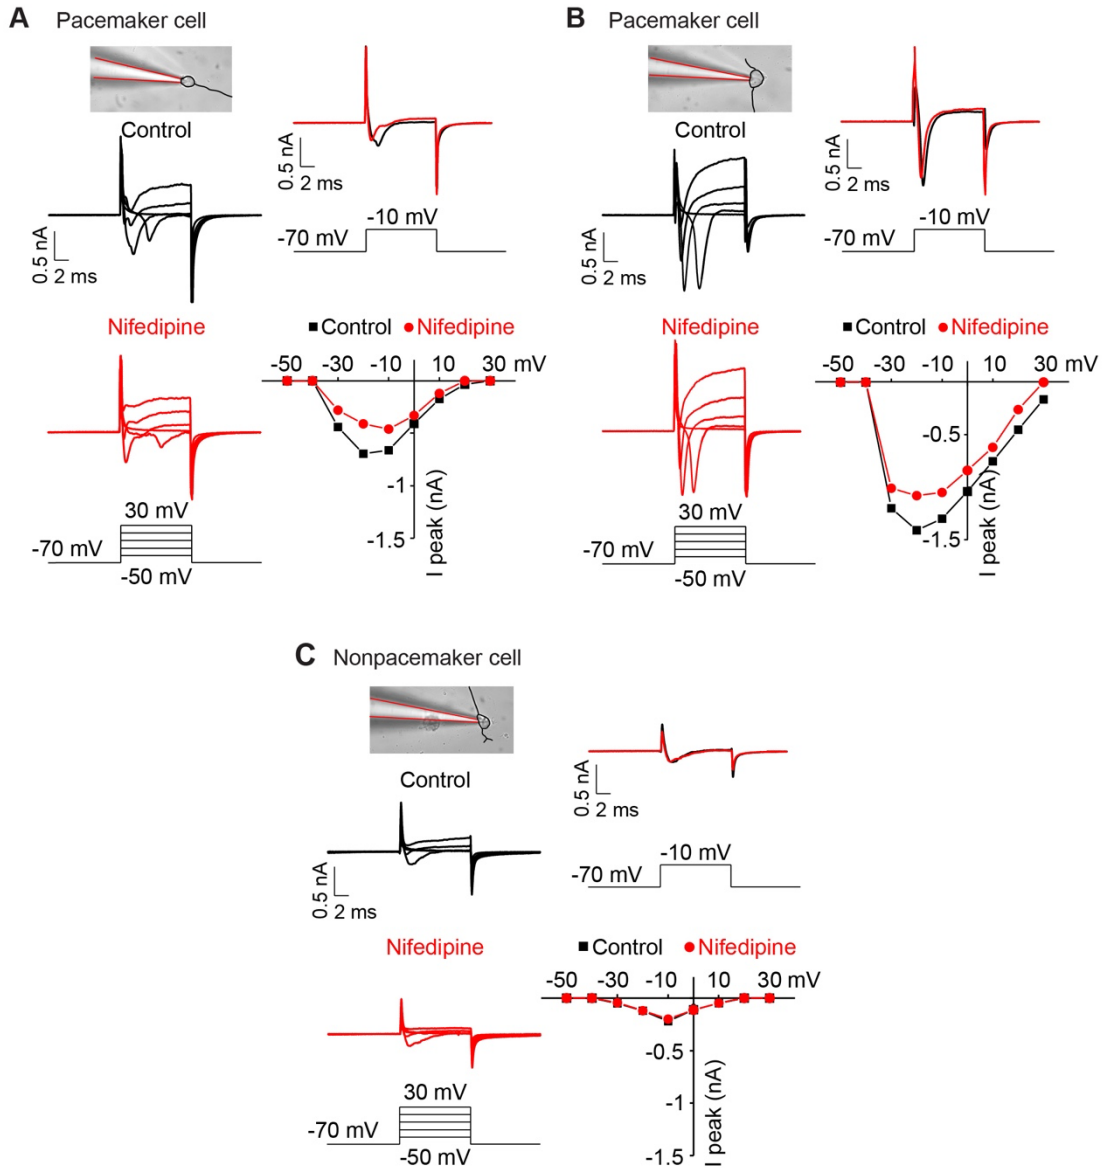

**Fig. S6. Pacemaker cells but not nonpacemaker cells are sensitive to L-type VGCC blocker nifedipine.** (A and B) Ion current recordings (voltage-clamp mode) in two pacemaker cells in absence (Control) or presence of 5  $\mu$ M nifedipine. In each panel, top left photomicrographs showing the cell with the patch-pipette attached. Soma and processes are highlighted in black overlay. Bottom left, voltage steps from -50 to +30 mV from -70 mV holding potential. Top right, residual inward current upon a current step from -70 mV to -10 mV. Bottom right, relationship between voltage and current. Peak conductance is seen at around -20 mV, characteristic for L-type VGCCs. Data are a summary of observations for each cell individually. (C) Ion current recordings (voltage-clamp mode) in a nonpacemaker cell from the same culture as (A), in absence (Control) or presence of 5  $\mu$ M nifedipine. Data are arranged as in the other panels. Note the insensitivity of the membrane conductance to nifedipine, as well as its peak at around -10 mV.

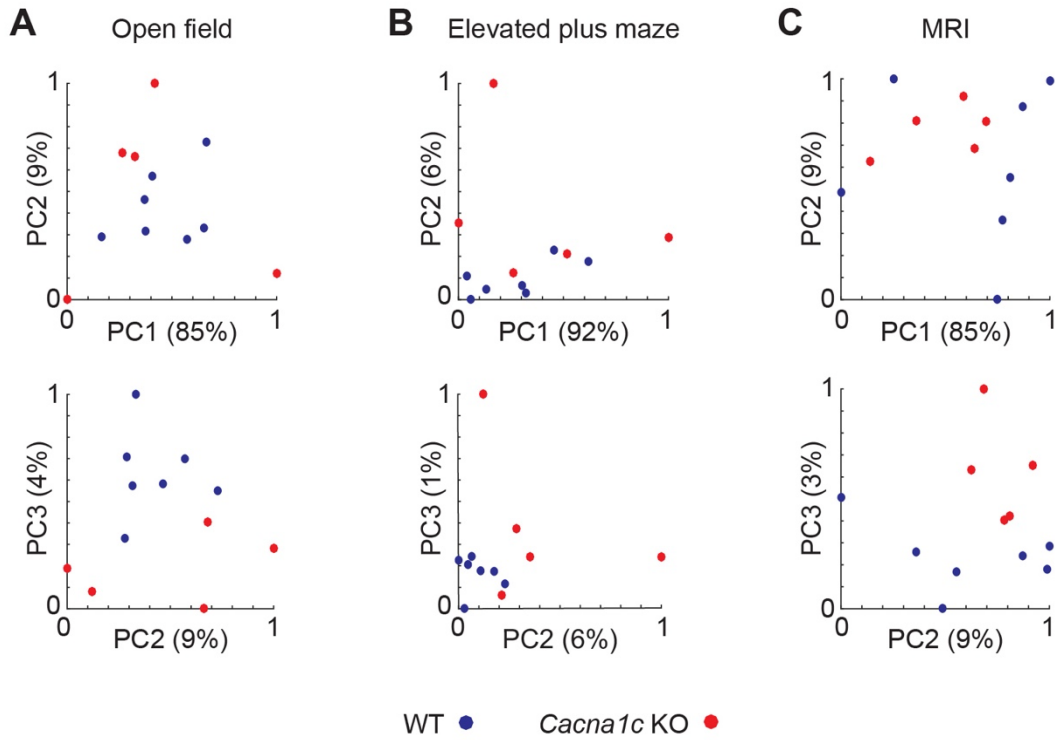

**Fig. S7. Principal component analysis of the behavioral tests and MRI measurements.** (A to C) Principal component (PC) analysis of the open field (A), elevated plus maze (B), and MRI (C) related variables for the WT (blue) and *Cacna1c* KO (red) mice. The percentages of total variance explained by the first three axes (PC1, PC2, and PC3) are given in parentheses.

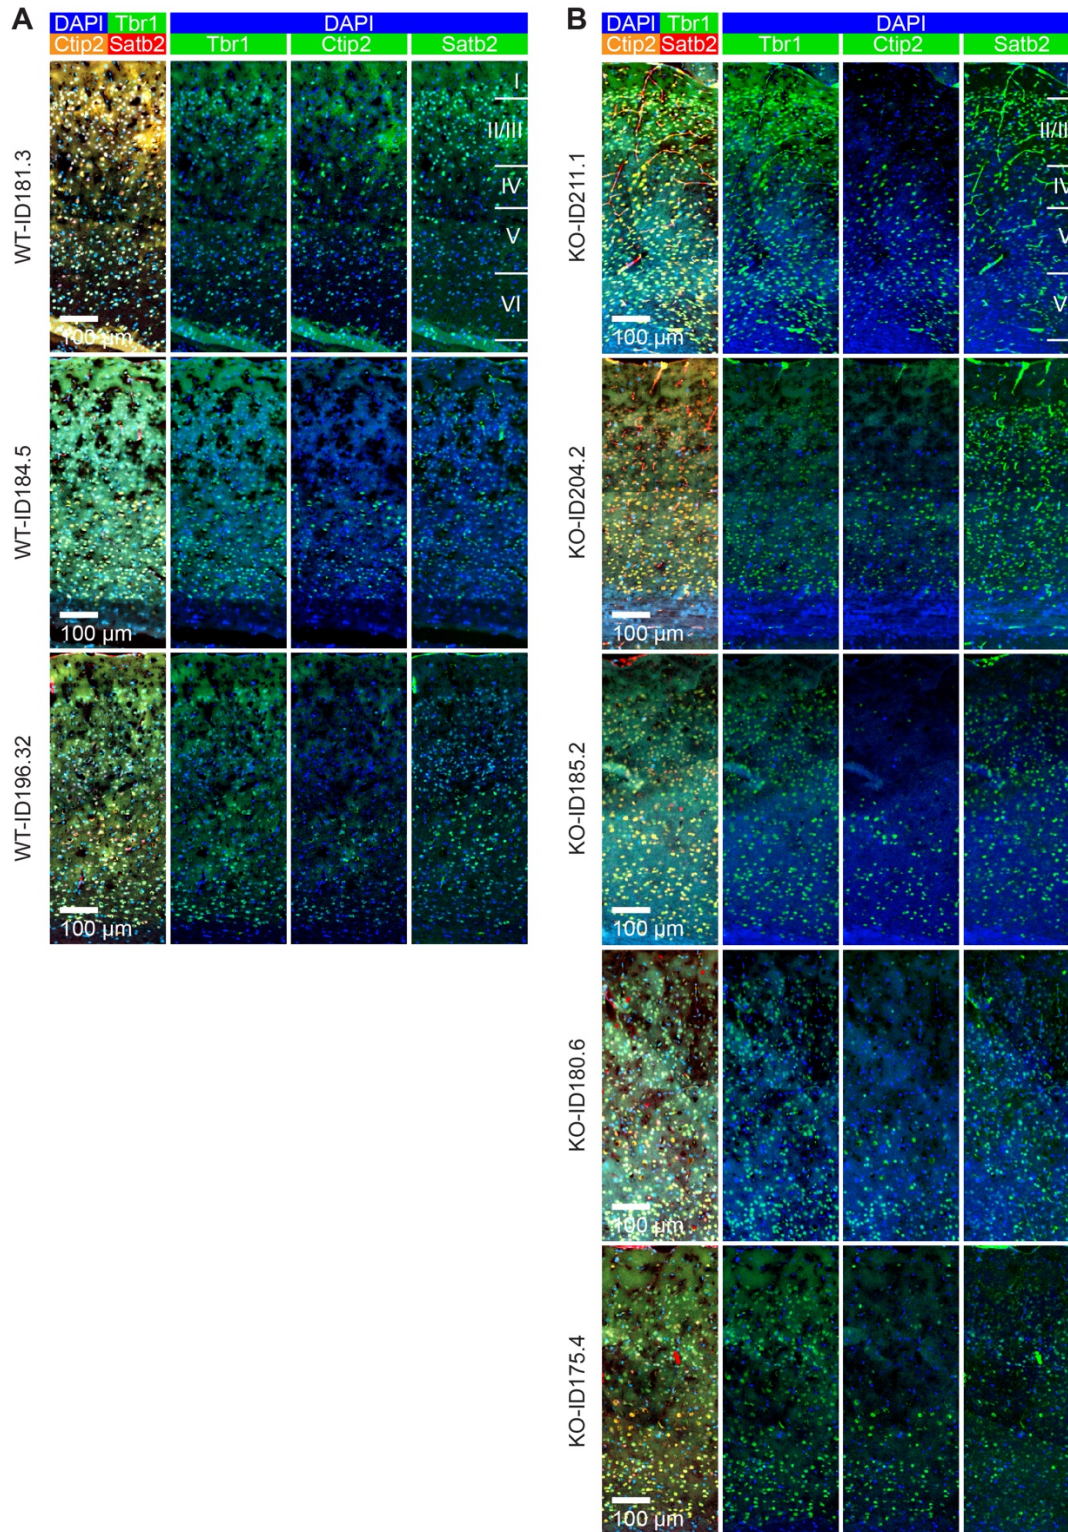

**Fig. S8. Knockout of *Cacna1c* does not alter cortex layers in mice.** (A and B) Immunohistochemistry images of the somatosensory cortex in WT (A,  $n = 3$ ) and *Cacna1c* KO (B,  $n = 5$ ) mice. Somatosensory cortex was stained with Tbr1, Ctip2 and Satb2. Nuclei were detected using DAPI. The mouse identification numbers are indicated. Scale bars, 100  $\mu\text{m}$ .

## Supplementary Tables

| Variable        | Value               | Unit         | Description                                            | Reference                                               |
|-----------------|---------------------|--------------|--------------------------------------------------------|---------------------------------------------------------|
| $C_m$           | 1                   | $\mu F/cm^2$ | Membrane capacitance per area                          | (1)                                                     |
| $I_{app}$       | 0                   | $nA/cm^2$    | Applied current per area                               | Bifurcation parameter, starting with no applied current |
| $g_K$           | 20                  | $\mu S/cm^2$ | K <sup>+</sup> channel conductance per area            | (1)                                                     |
| $V_K$           | -85                 | $mV$         | K <sup>+</sup> channel reverse potential               | (1)                                                     |
| $g_{Ca}$        | 20                  | $\mu S/cm^2$ | Ca <sup>2+</sup> channel conductance per area          | Bifurcation parameter, starting from (1)                |
| $V_{Ca}$        | 120                 | $mV$         | Ca <sup>2+</sup> channel reverse potential             | (1)                                                     |
| $g_{gap}$       | 200                 | $\mu S/cm^2$ | Gap junction conductance per area                      | Bifurcation parameter                                   |
| $v_{gap}$       | 20                  | 1/s          | Gap junction Ca <sup>2+</sup> permeability             | Bifurcation parameter                                   |
| $f_{cyt}$       | 0.003 (<.01 in (1)) | 1            | Buffering factor                                       | Chosen                                                  |
| $\phi$          | 12                  | 1/s          | Rate constant of K <sup>+</sup> channel                | (1)                                                     |
| $r$             | 10                  | $\mu m$      | Radius of cells                                        | Chosen                                                  |
| $F$             | 96500               | $C/mol$      | Faraday's constant                                     | (1)                                                     |
| $v_{RyR}$       | 5                   | 1/s          | RyR Ca <sup>2+</sup> permeability                      | (1)                                                     |
| $v_{leak,ER}$   | 0.2                 | 1/s          | ER leak permeability                                   | (1)                                                     |
| $\sigma$        | 0.02                | 1            | Ratio of effective ER and cytosol volumes              | (1)                                                     |
| $V_1$           | -3                  | $mV$         | Ca <sup>2+</sup> channel parameter, activation voltage | (1)                                                     |
| $V_2$           | 30                  | $mV$         | Ca <sup>2+</sup> channel parameter, voltage width      | (1)                                                     |
| $V_3$           | -20                 | $mV$         | K <sup>+</sup> channel parameter, activation voltage   | (1)                                                     |
| $V_4$           | 30                  | $mV$         | K <sup>+</sup> channel parameter, voltage width        | (1)                                                     |
| $v_{max,PMCA}$  | 17 (> 5 in (1))     | $\mu M/s$    | Maximum transport rate                                 | Chosen                                                  |
| $K_{1/2,PMCA}$  | 0.6                 | $\mu M$      | Affinity for Ca <sup>2+</sup>                          | (1)                                                     |
| $v_{max,SERCA}$ | 100                 | $\mu M/s$    | Maximum transport rate                                 | (1)                                                     |
| $K_{1/2,SERCA}$ | 0.2                 | $\mu M$      | Affinity for Ca <sup>2+</sup>                          | (1)                                                     |
| $K_a$           | 0.4                 | $\mu M$      | RyR parameter                                          | (1)                                                     |
| $K_b$           | 0.6                 | $\mu M$      | RyR parameter                                          | (1)                                                     |
| $K_c$           | 0.06 (< 0.1 in (1)) | 1            | RyR parameter                                          | Chosen                                                  |

**Table S1. Parameters used for mathematical modeling.** Mathematical parameters and experimental values used in the computational model.

## Supplementary Movie legends

**Movie S1 (separate file). Magnetic resonance imaging in axial view.** Visualization of the atlas-based segmentation of one adult mouse brain in axial view. Each color corresponds to one of the 39 segmented regions.

**Movie S2 (separate file). Magnetic resonance imaging in coronal view.** Visualization of the atlas-based segmentation of one adult mouse brain in coronal view. Each color corresponds to one of the 39 segmented regions.

**Movie S3 (separate file). Magnetic resonance imaging in sagittal view.** Visualization of the atlas-based segmentation of one adult mouse brain in sagittal view. Each color corresponds to one of the 39 segmented regions.

## SI References

1. M. E. Fall CP, Wagner JM and Tyson JJ, *Computational Cell Biology*, Interdisciplinary Applied Mathematics (Springer, 2002), vol. 20, pp. 468.
2. J. Keizer, L. Levine, Ryanodine receptor adaptation and Ca<sup>2+</sup>(-)-induced Ca<sup>2+</sup> release-dependent Ca<sup>2+</sup> oscillations. *Biophysical journal* **71**, 3477-3487 (1996).
3. S. Malmersjo *et al.*, Neural progenitors organize in small-world networks to promote cell proliferation. *Proceedings of the National Academy of Sciences of the United States of America* **110**, E1524-1532 (2013).
4. T. D. Helton, W. Xu, D. Lipscombe, Neuronal L-type calcium channels open quickly and are inhibited slowly. *J Neurosci* **25**, 10247-10251 (2005).
5. Y. A. Kuznetsov, *Elements of applied bifurcation theory* (Springer Science & Business Media, 2013), vol. 112.
6. M. Breakspear *et al.*, A unifying explanation of primary generalized seizures through nonlinear brain modeling and bifurcation analysis. *Cereb Cortex* **16**, 1296-1313 (2006).
7. E. M. Izhikevich, Neural excitability, spiking and bursting. *International Journal of Bifurcation and Chaos* **10**, 1171-1266 (2000).
8. F. A. Haight, *Handbook of the Poisson distribution* (Wiley, 1967).
